# Supplementary material for: Simulating ice thickness and velocity evolution of Upernavik Isstrøm1849–2012 by forcing prescribed terminus positions in ISSM
Source: Copernicus journal article supplement (doi:10.5194/tc-2017-121), 2017-07-17
Supplement: Supplementary file 1 [file supplementary.pdf › supplementary.pdf]

# **Supplementary Information for Simulating ice thickness and velocity evolution of Upernavik Isstrøm 1849-2012 by forcing prescribed terminus positions in ISSM**

Konstanze Haubner<sup>1,2</sup>, Jason E. Box<sup>1</sup>, Nicole J. Schlegel<sup>3,4</sup>, Eric Y. Larour<sup>3</sup>, Mathieu Morlighem<sup>5</sup>, Anne M. Solgaard<sup>1</sup>, Kristian K. Kjeldsen<sup>6</sup>, Signe H. Larsen<sup>1,7</sup>, and Kurt H. Kjær<sup>2</sup>

<sup>1</sup>Geological Survey of Denmark and Greenland (GEUS), Copenhagen, Denmark

<sup>2</sup>Centre for GeoGenetics, Natural History Museum, University of Copenhagen, Copenhagen, Denmark

<sup>3</sup>Jet Propulsion Laboratory (JPL), California Institute of Technology, Pasadena, CA, USA

<sup>4</sup>University of California, Los Angeles, CA, USA

<sup>5</sup>Department of Earth System Science, University of California-Irvine, Irvine, CA, USA

<sup>6</sup>DTU Space - National Space Institute, Technical University of Denmark, Department of Geodesy, Kgs. Lyngby, Denmark.

<sup>7</sup>Centre for Ice and Climate, Niels Bohr Institute, University of Copenhagen, Copenhagen, Denmark

*Correspondence to:* Konstanze Haubner (khu@geus.dk)

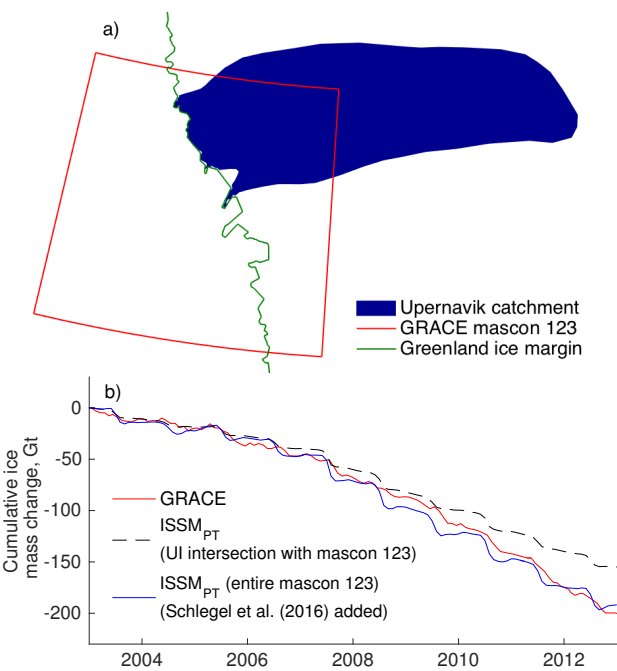

**Figure 1.** (a) GRACE area overview. UI catchment and model domain (blue polygon), present Greenland ice margin (green line) and the GRACE mascon (red line). (b) Mass change comparison between 2003 and 2012. GRACE (red), simulated mass loss of the intersection area of mascon 123 and model domain (dashed line) and a simulated mass loss (sum of ISSM<sub>PT</sub> simulated mass loss in mascon 123 and the ISSM SSA model output of Schlegel et al. (2016) to cover the entire domain) (blue line).

## References

Schlegel, N.-J., Wiese, D. N., Larour, E. Y., Watkins, M. M., Box, J. E., Fettweis, X., and van den Broeke, M. R.: Application of GRACE to the assessment of model-based estimates of monthly Greenland Ice Sheet mass balance (2003-2012), *The Cryosphere*, 10, 1965–1989, doi:10.5194/tc-10-1965-2016, 2016.
